# Supplementary material for: Glacial allopatry vs. postglacial parapatry and peripatry: the case of hedgehogs
Source: PeerJ. 2017 Apr 25;5:e3163. doi: 10.7717/peerj.3163 (PMC5407276; doi:10.7717/peerj.3163)
Supplement: Figure S1 — Genotypes of 260 individuals [file peerj-05-3163-s004.xlsm]

## Sheet: vše
BH1	138	140	162	166	176	183	281	285	94	94	155	166	144	156	248	248	281	281
BH10	125	140	140	162	168	178	281	285	94	94	151	168	147	184	250	252	281	281
BH11	129	129	159	164	178	189	285	285	94	94	157	168	149	149	239	246	272	276
BH13	136	136	162	164	176	183	281	281	94	94	159	168	147	160	248	248	276	281
BH14	125	136	164	168	180	187	281	285	94	94	0	0	149	149	0	0	272	276
BH15	129	136	161	162	178	180	281	285	94	94	155	155	149	149	239	239	276	288
BH16	134	138	159	164	180	184	281	285	94	94	153	153	147	147	244	252	270	276
BH17	138	140	162	166	176	183	281	285	94	94	153	166	147	156	246	248	0	0
BH18	132	140	151	159	176	176	281	285	94	100	155	166	144	156	239	248	281	281
BH19	136	136	166	166	176	176	281	281	94	94	155	159	147	172	239	252	0	0
BH2	132	140	151	159	176	176	281	285	94	100	155	166	144	156	248	248	281	281
BH20	129	129	159	168	176	184	281	287	94	94	159	168	144	172	239	248	276	283
BH21	125	127	162	162	176	180	281	281	94	94	166	168	147	151	239	248	0	0
BH22	129	140	151	164	189	189	285	287	94	94	155	159	147	147	239	248	0	0
BH23	129	140	164	166	174	178	0	0	94	94	155	174	147	147	246	250	0	0
BH24	129	136	140	151	176	176	285	285	94	94	159	166	147	153	244	248	272	281
BH25	138	138	162	168	176	180	283	285	94	94	155	159	158	172	246	248	272	278
BH3	132	136	140	170	176	183	281	285	94	94	159	168	147	160	248	248	276	281
BH4	125	134	164	164	183	184	285	285	94	94	155	157	149	156	239	239	0	0
BH5	129	136	166	168	178	189	281	281	94	94	153	155	149	149	239	256	272	278
BH6	136	136	161	162	178	193	281	285	94	94	153	172	149	158	246	246	281	292
BH7	125	139	162	164	178	178	285	287	94	94	153	159	144	147	248	250	278	279
BH8	129	129	159	168	174	178	281	281	94	94	153	155	151	172	246	246	272	274
BH9	129	138	151	168	178	184	281	287	94	94	155	161	147	158	248	248	278	279
BLG1	136	140	151	162	174	184	281	287	94	100	151	157	147	149	239	239	278	281
BLG3	125	129	162	170	174	178	281	289	94	94	151	157	149	151	239	248	272	272
BLG4	138	138	161	166	168	189	269	276	94	94	153	155	149	168	246	248	0	0
CR1	125	132	159	161	180	180	285	287	94	94	155	157	147	147	246	250	278	279
CR11	136	140	151	162	180	180	281	285	94	94	153	155	149	149	248	248	279	279
CR13	125	132	168	170	180	180	281	287	94	94	172	174	144	147	246	248	274	274
CR14	134	134	161	162	187	195	281	290	94	94	155	161	149	178	239	248	276	285
CR15	125	125	151	170	176	184	287	287	94	94	155	159	153	153	252	252	283	283
CR16	125	125	151	170	176	184	287	287	94	94	155	159	153	153	252	252	283	283
CR17	136	136	159	159	183	187	281	285	94	94	153	163	149	170	248	248	272	279
CR18	132	136	162	164	176	178	0	0	94	94	155	155	147	160	246	254	0	0
CR19	129	132	153	170	184	184	281	281	94	94	151	155	147	147	248	248	279	279
CR2	132	134	159	164	178	180	285	285	94	94	153	157	149	172	239	248	272	288
CR20	127	132	151	151	180	184	281	287	94	94	155	159	153	153	246	248	274	274
CR21	132	140	164	168	176	176	276	287	94	94	155	157	156	156	239	254	279	279
CR3	125	127	159	164	178	183	281	287	94	94	157	157	149	149	239	248	274	278
CR4	132	136	162	170	176	189	285	285	94	94	157	159	147	156	239	248	279	285
CR5	132	138	161	164	180	180	281	281	94	94	153	159	184	187	239	246	285	285
CR6	132	138	161	164	180	180	281	281	94	94	153	159	184	187	239	246	0	0
CR7	119	138	166	166	178	178	0	0	94	100	155	159	149	172	246	248	276	276
CR8	127	140	166	170	176	176	281	285	94	94	155	166	149	172	239	248	279	283
CR9	127	140	166	170	176	176	281	285	94	94	155	166	149	172	239	248	279	283
GR19	129	134	140	159	176	184	281	285	94	100	153	163	172	174	250	256	274	281
GR20	125	125	162	166	172	172	281	285	94	94	166	168	144	174	248	248	281	281
GR34	129	136	159	161	180	180	290	290	100	100	155	157	156	158	246	246	270	276
GR35	129	134	159	161	180	180	290	292	94	100	148	155	153	158	246	260	272	276
GR37	134	134	159	162	180	183	287	290	94	100	148	155	153	158	246	246	0	0
GR42	132	134	159	159	180	183	290	290	0	0	148	155	153	153	0	0	0	0
GR43	129	134	159	159	178	180	281	290	100	100	155	155	153	153	246	246	272	272
GR47	132	134	159	159	180	180	290	292	100	100	155	155	153	153	246	246	0	0
GR48	129	129	159	159	183	184	281	292	94	100	155	155	153	156	246	246	0	0
GR50	134	138	159	159	180	183	292	292	94	94	155	163	153	153	246	246	0	0
GR51	132	134	159	161	180	183	290	290	94	94	148	155	161	161	246	246	274	274
GR52	132	134	157	159	180	184	281	281	94	94	155	155	153	153	246	246	272	276
GR54	136	138	159	159	180	184	281	281	94	94	168	170	156	156	246	246	274	276
GR56	132	134	159	161	178	180	290	290	94	100	155	157	158	161	246	246	0	0
GR62	127	134	159	159	180	180	290	290	94	94	155	155	153	168	246	246	276	276
GR66	132	134	159	159	180	183	276	292	100	100	148	155	153	153	246	246	274	279
GR67	129	138	159	159	180	187	276	292	100	100	148	155	153	153	246	246	274	276
GR68	134	136	159	164	180	180	290	290	94	94	155	155	156	156	246	246	268	270
GR69	134	134	159	159	180	184	290	294	100	100	155	155	153	158	246	246	272	276
GR74	134	134	159	159	180	180	290	290	94	94	148	148	153	153	246	246	272	276
GR77	138	140	159	159	180	180	292	292	100	100	148	155	158	158	246	246	0	0
GR78	134	136	157	159	178	180	0	0	100	100	155	155	153	153	246	246	0	0
GR79	125	140	162	164	183	191	281	281	94	94	155	155	144	149	246	248	0	0
GR80	125	132	164	168	184	189	281	285	94	94	151	155	151	151	246	248	272	276
GR81	134	136	159	159	178	183	281	290	100	100	148	148	153	153	246	246	272	272
GR82	134	134	159	159	180	180	290	292	94	94	148	155	158	158	246	246	274	274
GR83	129	134	157	159	178	180	0	0	100	100	148	148	153	153	0	0	0	0
GR86	125	138	155	161	176	183	281	289	94	100	161	161	144	144	246	246	0	0
GR87	129	138	159	159	180	180	290	292	94	100	155	157	153	156	246	246	274	278
GR88	129	143	159	172	178	183	281	283	94	100	153	166	147	156	246	246	272	272
GR89	129	129	159	159	178	180	290	290	94	94	148	155	153	153	246	246	274	276
GR90	129	132	162	164	183	184	281	281	94	94	155	163	147	176	246	248	272	274
GR94	121	123	159	159	180	183	290	290	100	100	155	155	153	153	246	246	276	276
M10	136	136	159	159	184	184	281	283	94	94	144	144	144	168	250	250	272	272
M11	134	134	162	162	184	187	281	290	94	94	159	159	149	151	246	248	274	276
M12	129	138	159	161	176	178	281	283	94	94	159	161	153	153	248	250	246	287
M4	129	145	159	162	184	184	289	290	94	94	159	159	153	168	246	248	0	0
M5	129	134	159	159	180	187	283	283	94	96	155	163	168	170	246	246	272	276
M6	113	132	162	164	183	184	281	281	94	94	153	159	166	168	246	246	276	276
M7	113	134	161	161	162	183	281	292	94	94	159	163	153	170	248	250	276	283
M8	134	134	162	166	184	184	281	292	94	96	144	159	168	168	246	250	274	274
M9	129	129	159	166	178	183	281	285	94	94	157	159	168	170	246	248	276	278
MC1	129	129	159	164	184	184	281	281	96	96	124	168	168	168	241	241	274	274
MC10	129	129	159	168	174	178	281	281	94	94	153	155	151	172	246	246	272	274
MC11	138	140	155	164	178	187	276	283	94	100	153	155	144	149	246	248	276	278
MC12	127	132	159	159	180	184	285	287	94	94	151	159	147	176	248	248	276	276
MC14	129	129	159	164	184	184	281	281	94	94	153	161	149	170	246	246	270	272
MC16	127	140	164	164	183	184	281	281	94	94	151	161	144	156	246	248	0	0
MC18	125	136	161	164	180	189	285	285	88	94	155	155	147	147	246	248	0	0
MC4	138	143	159	164	176	187	281	285	94	94	157	159	149	161	246	256	274	274
MC5	132	134	168	168	183	184	281	283	94	94	168	168	147	172	248	248	270	274
MC6	123	127	162	164	183	184	281	283	94	94	155	159	149	156	239	248	272	276
MC7	129	138	161	166	180	187	281	283	94	100	155	157	0	0	246	248	272	274
MC8	117	138	159	159	184	187	283	287	94	100	153	155	144	174	246	256	278	281
MC9	138	143	159	164	176	187	281	285	94	100	157	159	149	161	246	256	274	274
MN1	132	138	140	159	176	189	285	287	94	94	157	159	151	151	246	250	0	0
MN2	129	138	159	159	176	180	281	281	94	94	155	168	144	170	246	250	276	279
MN3	129	132	151	159	183	187	276	285	94	94	151	168	144	147	0	0	0	0
MN4	129	132	151	159	183	187	276	285	94	100	151	168	144	147	246	248	270	278
MN5	132	136	162	170	176	189	285	285	94	94	157	159	147	156	239	248	279	285
MN6	132	140	159	159	189	191	281	285	94	94	157	157	147	147	239	239	274	274
RMN10	138	140	161	162	183	187	281	281	94	94	155	159	144	149	246	248	0	0
RMN11	127	136	159	161	176	180	281	285	94	94	144	155	149	151	239	246	272	279
RMN12	127	136	159	170	183	189	281	283	94	94	153	155	144	149	246	248	0	0
RMN13	136	138	153	161	176	183	285	285	94	94	159	174	149	168	248	248	267	268
RMN14	136	138	159	161	187	189	285	285	94	94	153	157	144	166	246	248	272	272
RMN15	127	138	159	162	0	0	0	0	94	100	153	155	144	172	239	239	0	0
RMN16	117	127	161	161	176	178	276	281	94	94	153	155	149	158	0	0	0	0
RMN17	134	143	159	166	180	180	281	285	94	94	153	155	151	151	246	248	263	274
RMN18	102	136	166	166	158	189	283	283	94	96	151	153	144	144	246	246	279	279
RMN19	123	134	159	162	176	189	281	283	94	94	153	153	151	151	248	248	0	0
RMN20	136	140	168	172	0	0	0	0	94	94	144	155	170	170	250	250	270	278
RMN21	136	140	162	174	183	183	283	283	94	94	157	161	149	160	250	250	272	276
RMN23	101	136	159	166	183	183	0	0	94	94	157	157	144	147	248	250	272	272
RMN24	138	140	159	161	187	189	281	285	94	94	151	151	144	144	248	248	276	278
RMN25	132	136	159	162	164	184	0	0	96	96	153	161	147	166	246	246	272	272
RMN26	136	136	162	170	183	183	0	0	94	94	155	159	149	149	0	0	0	0
RMN29	125	127	159	159	187	187	281	281	94	94	157	161	144	144	248	248	0	0
RMN33	136	143	162	164	178	184	283	283	94	94	157	166	147	147	248	248	0	0
RMN34	127	134	155	172	178	183	287	287	96	100	155	161	144	166	246	252	0	0
RMN36	117	136	164	166	178	178	0	0	94	94	151	155	144	144	0	0	0	0
RMN37	134	136	162	164	184	187	281	285	94	96	161	161	144	144	248	250	0	0
RMN38	132	138	159	161	191	193	0	0	0	0	161	161	147	153	250	250	0	0
RMN39	119	134	159	161	183	183	281	281	94	96	148	157	147	147	246	250	270	270
RMN4	132	138	166	170	180	180	0	0	94	94	157	166	144	149	248	248	0	0
RMN41	134	136	159	164	184	184	281	287	96	96	161	161	144	144	248	252	272	278
RMN42	125	127	162	162	176	180	281	281	94	94	155	159	144	166	0	0	0	0
RMN45	127	134	162	170	176	191	281	283	94	94	151	155	149	151	246	248	0	0
RMN48	129	132	159	164	180	184	285	287	94	94	157	157	147	153	246	246	0	0
RMN6	119	119	166	166	178	193	285	287	94	94	157	157	144	160	248	248	268	270
RMN8	132	136	159	164	174	183	0	0	96	96	155	155	147	166	250	250	272	272
RMN9	127	134	161	162	162	193	285	285	94	94	157	157	144	166	246	250	0	0
sk34	134	134	159	159	174	183	281	281	94	94	151	151	138	170	248	250	274	276
sk44	129	132	159	159	183	184	278	281	94	94	148	151	168	170	250	250	274	276
sk48	127	127	159	166	187	187	281	281	94	94	144	157	144	153	248	248	272	281
sk49	127	134	159	166	183	184	281	281	94	94	144	157	144	144	246	246	274	276
sk50	127	127	159	166	183	184	281	281	94	94	155	157	144	172	248	248	274	276
sk51	127	134	159	166	183	184	281	281	94	94	155	157	153	172	246	248	274	276
SL1	129	143	170	170	178	184	281	287	94	94	153	161	147	170	239	246	270	276
SL10	136	136	170	170	180	180	281	281	94	94	151	161	147	156	246	256	276	276
SL11	129	136	159	170	176	183	281	281	94	94	153	153	149	156	244	246	272	276
SL12	129	136	159	170	176	183	281	281	94	94	153	153	149	156	244	246	272	276
SL13	136	136	159	166	180	184	281	281	94	94	153	157	147	149	246	256	276	288
SL15	125	129	159	174	180	180	281	281	94	94	151	153	144	149	248	248	276	276
SL16	129	132	159	172	180	180	281	281	94	94	155	157	149	172	248	256	272	272
SL17	132	143	159	166	178	184	281	281	94	94	153	153	144	153	250	250	272	283
SL19	125	125	164	170	178	178	281	292	94	94	155	159	147	172	0	0	272	281
SL20	129	132	162	166	178	180	281	281	94	94	155	157	149	153	239	248	0	0
SL22	125	125	170	170	176	176	285	285	94	94	155	159	153	168	252	252	279	279
SL23	129	132	162	170	180	183	281	285	94	94	155	157	149	172	239	256	276	283
SL24	132	136	164	172	180	183	281	281	94	94	153	157	147	156	246	248	0	0
SL25	129	136	159	159	180	180	281	281	94	94	153	159	149	156	246	248	276	276
SL26	125	136	162	162	180	187	285	285	94	94	153	161	147	172	246	256	279	285
SL27	129	129	159	166	180	184	281	281	94	94	148	157	149	149	248	248	276	279
SL28	129	136	159	164	184	187	281	299	94	94	157	157	147	170	248	256	276	278
SL29	125	136	159	164	180	184	281	281	94	100	153	155	156	170	239	244	0	0
SL3	134	134	159	159	158	176	283	287	94	94	157	157	147	176	250	250	272	279
SL30	129	136	162	162	172	183	281	281	94	94	151	159	147	149	248	256	274	281
SL31	132	136	159	159	172	183	281	287	94	94	153	157	156	170	244	248	274	276
SL32	134	134	170	172	172	180	281	285	94	100	153	157	144	147	246	256	278	283
SL33	132	136	159	170	184	184	281	281	94	94	153	159	147	170	246	256	278	278
SL35	138	138	170	172	0	0	0	0	94	94	153	172	149	153	0	0	0	0
SL36	132	138	170	172	178	184	281	287	94	94	151	153	147	170	244	246	0	0
SL37	132	134	151	162	178	187	281	281	94	94	172	172	147	170	239	239	276	288
SL38	136	138	170	170	180	183	0	0	94	100	153	159	147	149	239	248	272	276
SL39	125	132	170	172	180	189	0	0	94	94	153	153	170	170	0	0	0	0
SL4	129	129	159	162	187	187	281	281	94	94	155	155	147	147	239	246	276	288
SL40	129	136	159	170	180	183	285	285	94	100	159	159	147	172	248	248	276	276
SL41	129	129	162	172	180	180	281	281	94	100	153	153	147	147	246	246	0	0
SL42	136	138	159	161	184	184	281	281	94	100	153	159	170	170	248	248	279	279
SL43	132	136	159	170	180	183	281	281	94	94	153	157	153	156	246	248	0	0
SL44	129	138	159	170	183	184	281	281	94	94	153	153	168	170	248	248	279	287
SL45	129	129	161	166	184	189	281	281	94	94	153	159	172	178	246	246	278	278
SL5	132	136	162	170	180	183	281	281	94	94	151	157	156	172	244	248	276	281
SL7	129	129	162	170	180	184	281	285	94	94	153	159	147	172	239	244	276	290
SL8	127	145	162	164	176	183	281	281	94	94	153	157	168	170	246	250	276	283
SR1	138	140	140	159	183	183	281	285	94	94	153	155	144	151	246	248	272	274
SR2	129	134	155	172	184	187	281	294	94	94	155	157	144	144	246	248	272	272
SR3	123	140	159	166	178	180	281	283	100	100	148	157	156	161	246	246	276	278
SR4	123	134	151	159	187	189	285	285	94	104	0	0	0	0	239	248	0	0
SR5	123	123	159	162	176	178	281	285	94	104	151	157	147	151	246	248	276	279
SR6	117	140	159	166	176	178	281	285	94	104	157	157	149	153	246	248	276	278
SR7	125	129	159	166	178	178	281	281	94	104	155	172	153	153	246	248	274	274
SR8	125	129	159	166	178	178	281	281	94	104	155	172	153	153	246	248	274	274
VOJ1	134	134	159	159	158	176	283	287	94	94	157	157	147	176	250	250	272	279
VOJ2	134	134	159	159	183	189	285	287	94	94	151	157	147	166	248	248	270	274
1	119.2	131.7	162.3	164.3	176	180	281	281	94	94	151	159	144	144	246	248	272	281
5	119.1	133.8	162.2	164.2	180.4	180.4	281	289	94	94	144	157	144.2	153	250	250	272	277.8
7	131.8	138.2	164.3	164.3	178.5	183.6	289	289	94	94	148	157	144.1	144.1	248	250	272	277.8
8	131.8	131.8	161.4	161.4	178.6	190.8	281	289	94	94	157	158.6	144.4	144.4	250	250	277.8	281
9	131.7	131.7	159.4	166.2	174.3	176.4	281	281	94	94	148	148	144.2	176	248	250	272	270.4
10	119	132	162	164	0	0	281	289	94	94	144	148	144.2	169.8	248	250	272	277.7
14	129.4	129.4	162.2	164.2	183	191	281	281	94	94	157	158.7	167.9	169.9	248	250	276.1	283
16	131.7	138.1	159.3	164.2	176.2	176.2	281	289	94	94	158.7	158.7	144.2	144.2	248	248	272	272
17	119	119	164.2	164.2	174.2	180.3	289	289	94	94	151	153	144.1	144.1	246	248	272.4	281
18	135.8	135.8	166	166	180.3	180.3	281	289	94	94	144	157	144.2	176	246	250	278	283
21	131.6	138	159.1	164.2	176.3	180.4	283	289	94	94	158.6	158.6	144.1	144.1	246	248	270.4	277.7
22	132	138	159.4	164.4	184	189	281	290	94	94	153	153	144.1	144.1	248	248	270.4	281
24	131.7	133.8	159.4	161.4	180	184.6	283	289	94	94	144	157	144.2	144.2	246	250	274.1	279
25	131.8	133.9	164.4	168	176	284.7	289	289	94	94	144	144	144.3	144.3	248	250	270	276
26	131.9	131.9	159.3	162.3	180	180	283	289	94	94	144	157	144.2	144.2	246	248	277.9	283
27	119.2	131.7	159.4	168	176.4	183.6	289	289	94	94	144	151	144.2	174	248	250	270	270
28	131.8	131.8	159	161.4	180	183.7	281	289	94	94	144	151	144.1	144.1	246	246	272.4	281
29	119.2	133.8	166.2	166.2	183.6	183.6	290	290	94	94	144	159	144.1	173.8	246	250	274.1	274.1
32	131.8	131.8	161.3	166.2	183.6	183.6	281	281	94	94	144	144	147	169.9	246	248	270	276
43	131.6	131.6	161.2	169	180.3	180.3	281	281	94	94	144	144	141.9	144.3	248	248	277.8	279
44	119	132	161.3	164.3	180.4	183	281	281	94	94	144	157	144.1	144.1	248	248	272.3	279
47	119	119	164.2	166.1	180.4	196.7	281	285	94	94	144	153	144.1	144.1	248	248	281	283
58	131.7	133.8	159.2	161.4	190.7	192.7	289	290.4	94	94	151	153	144.3	176.4	248	248	283	283
59	131.7	133.8	159.3	161.4	180	192.7	289	290.4	94	94	144	153	144.1	144.1	246	248	283	283
84	137.9	137.9	159.2	159.2	180.3	183.4	283	289	94	94	158.6	158.6	144.3	169.8	248	248	277.9	281
85	131.7	131.7	164.3	164.3	180.4	183	285	285	94	94	144	158.6	144	144	248	250	279	281
96	131.5	137.9	164	166	172.1	183.4	283	283	94	94	144	151	144	144	246	246	270	276.2
98	131.6	131.6	159.4	161	176.4	180	281	283	94	94	157	157	144	153	246	246	276	278
101	131.6	131.6	159.4	161	176.4	180	281	283	94	94	151	151	144	144	241	246	270	270
111	132	132	161	166.3	180	180	285	285	94	94	153	157	144	144	246	246	272	274
112	119	132	164.3	164.3	180	184	281	289	94	94	151	157	144	174	246	246	272	281
113	119	138	175.3	175.3	176.3	196.8	281	289	94	94	151	157	144	174	246	248	270	281
116	131.6	131.6	159	159	180.4	196.7	281	283	94	94	144	144	144	174	246	248	270	283
117	119	119	161	166	176.2	180.4	281	289	94	94	144	153	144	144	246	248	270	272
121	132	132	161	164	184	197	285	289	94	94	144	157	144	168	246	250	281	283
123	132	132	166.2	166.2	180	183.6	289	289	94	94	144	144	144	174	246	250	272	281
124	132	132	162	164	184	184	289	289	94	94	144	144	144	144	248	248	270	274
129	132	132	161	161	176	184	281	290	94	94	151	151	144	144	250	250	270	274
135	132	140.4	159.4	166.3	176	176	281	299	94	94	144	144	147	147	246	248	281	281
139	129	132	159	166	176	176	0	0	94	94	144	151	144	172	250	250	0	0
142	132	132	161.4	161.4	180	180	281	281	94	94	144	144	144	144	248	250	270	281
144	132	132	161.4	164	191	193	281	290	94	94	144	153	176	176	248	250	270	283
147	132	138	159.4	164	162	176.4	281	281	94	94	159	159	144	168	246	250	274	278
149	132	132	164.3	164.3	176.3	184	283	289	94	94	151	153	135.3	137.6	246	250	278	283
164	132	132	159	164	180	189	289	290	94	94	151	151	144	144	246	248	281	281
168	132	132	159	161	180	184	281	290	94	94	144	144	144	172	246	250	279	281
183	132	132	159	159	189	191	281	281	94	94	151	151	144	170	248	250	270	279
209	132	134	159	159	183	183	281	297	94	94	144	157	151	170	248	248	270	270
214	132	132	164	166	180	183	281	281	94	94	144	157	144	174	248	248	270	274
sk7	119	134	161	161	0	0	281	281	94	94	144	157	138	172	248	250	276	278
sk8	134	136	158.9	164.8	182.8	184	285.1	290	94	94	152.9	157.2	137.5	178.4	247.9	247.9	274.1	275.8
sk9	119	132	158.9	166	182.8	184	281.4	281.4	94	94	148	157.2	153.3	153.3	246	246	270.4	277.6
sk11	134	140	160.9	160.9	182.8	184.1	290.5	290	94	94	143.6	143.6	178.4	180.4	245.8	247.9	277.6	277.6
sk12	132	148	159.1	159.1	189.1	199	281	285.1	94	94	150.7	161	148.9	153.4	245.8	248	270.4	277.6
sk13	129	129	162	166	182.9	184	281	290	94	94	150.7	150.7	168.2	174.3	245.8	248	272.3	275.8
sk14	129	134	160.9	166	184	184	283	288.8	94	96	148.4	161	153.4	168.2	248.2	250.3	274.2	274.2
sk15	129	132	159.2	162	178.6	182.8	281.4	281.4	94	94	148.3	155	169.9	171.9	245.7	247.8	273.9	281
sk16	132	132	159.1	164.7	176	184	281.4	281.4	94	94	148.3	150.6	169.9	172	247.8	250	275.7	281
sk17	132	134	162	162	184	191.1	281.4	281.4	94	94	157.1	157.1	144	144	245.8	247.9	274	283
sk20	136	138	162	164	180.8	180.8	288.7	288.7	94	94	143.6	155	144	144	245.8	247.9	272.2	278
sk21	136	136	162	166	176	182.8	281	288.7	94	94	146	155.1	144	144	245.8	248	275.8	279
sk22	121	136	158.9	166	170.4	182.9	283.3	285.1	94	94	152.9	159.4	137.5	144.3	245.9	248.1	283	283
sk23	136	138	164	164.7	184	186.8	281.3	285	94	94	152.8	159.3	151.3	153.3	245.7	247.9	277.6	283
sk24	119	132	166	166	176.4	176.4	281.3	294	94	94	143.6	163	151.3	174.2	245.7	250	272.1	277.5
sk25	134	136	158.9	158.9	180.6	184	281.3	290.4	94	94	143.6	143.6	144	153.3	245.6	245.6	275.7	277.5
sk28	132	134	158.9	160.8	182.8	182.8	281.4	290	94	94	143.6	143.6	137.5	174.3	245.8	245.8	277.6	277.6
sk29	132	138	158.9	166	182.8	182.8	290	290	94	94	152.9	159.3	144	172.1	250.1	250.1	274	277.6
sk30	132	138	162	162	182.9	187	283.2	297.7	94	94	143.7	157.3	153.4	170	248.1	248.1	274.1	275.9
